# Supplementary material
Source: HighWire-hosted journal article supplement (https://erj.ersjournals.com/content/56/1/1902219)
Supplement: inline-supplementary-material-1 [file inline-supplementary-material-1.pdf]

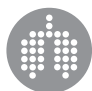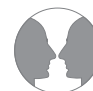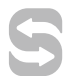

SHAREABLE PDF

# A comparison of daily physical activity profiles between adults with severe asthma and healthy controls

Jill Neale<sup>1,2</sup>, Mark W. Orme<sup>1,3</sup>, Sally Majd<sup>1,2,3</sup>, Stacey Chantrell<sup>1,3</sup>, Sally J. Singh<sup>1,2,3</sup>, Peter Bradding<sup>1,2,3</sup>, Ruth H. Green<sup>1,2,3</sup> and Rachael A. Evans <sup>1,2,3</sup>

**Affiliations:** <sup>1</sup>Leicester Biomedical Research Centre (Respiratory), Glenfield Hospital, Leicester, UK. <sup>2</sup>Dept of Respiratory Sciences, University of Leicester, Leicester, UK. <sup>3</sup>Dept of Respiratory Medicine, Thoracic Surgery and Allergy, Glenfield Hospital, University Hospitals of Leicester NHS trust, Leicester, UK.

**Correspondence:** Rachael A. Evans, Glenfield Hospital, Groby Road, Leicester, UK. E-mail: re66@leicester.ac.uk

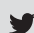

@ERSpublications

**Compared to controls, adults with severe #asthma attain fewer daily steps and reduced sustained moderate-vigorous #physicalactivity which are associated with worse quality of life. Physical activity and #exercise interventions are needed for severe asthma.** <http://bit.ly/2W8c7Qa>

**Cite this article as:** Neale J, Orme MW, Majd S, *et al.* A comparison of daily physical activity profiles between adults with severe asthma and healthy controls. *Eur Respir J* 2020; 56: 1902219 [<https://doi.org/10.1183/13993003.02219-2019>].

This single-page version can be shared freely online.

## To the Editor:

Severe asthma is associated with a substantial burden of disease, including premature death and reduced quality-adjusted life years [1]. Care in specialist centres is associated with reduced exacerbation rates and healthcare utilisation, but at the cost of increased use of systemic steroids and increased body mass index (BMI) [2]. Common comorbidities, such as metabolic syndrome and type 2 diabetes are associated with low levels of moderate-vigorous physical activity (MVPA) [3]. Guidelines recommend that adults accumulate either  $\geq 150$  min of moderate intensity activity or  $\geq 75$  min of vigorous intensity activity per week, accumulated in bouts of any length [4]. Adults with severe asthma may avoid MVPA due to negative expectations and fear-avoidance beliefs [5]. A few small studies have reported that daily step count and time spent in MVPA may be reduced in adults with severe asthma compared to controls [6–8]. However, results are conflicting when physical activity levels are adjusted for confounders such as age, gender, obesity and smoking [7]. Furthermore, adults with severe asthma have reduced health-related quality of life (HRQoL), but whether physical activity levels impact on HRQoL is unknown [9].
